# Supplementary material
Source: PubMed Central journal article supplement (PMC7351406)
Supplement: mmc1.pdf [file mmc1.pdf]

# THE LANCET

## Rheumatology

### Supplementary appendix

This appendix formed part of the original submission. We post it as supplied by the authors.

Supplement to: Moezinia CJ, Ji-Xu A, Azari A, Horlick S, Denton C, Stratton R. Iloprost for COVID-19-related vasculopathy. *Lancet Rheumatol* 2020; published online July 10. [https://doi.org/10.1016/S2665-9913\(20\)30232-0](https://doi.org/10.1016/S2665-9913(20)30232-0).

## Supplementary Appendix

Supplement to: Moezinia CJ, *et al.* Iloprost: a potential treatment for COVID-19 related vasculopathy.

|                                                                      | Patient 1                                                                                   | Patient 2                                                                                                                         | Patient 3                                           |
|----------------------------------------------------------------------|---------------------------------------------------------------------------------------------|-----------------------------------------------------------------------------------------------------------------------------------|-----------------------------------------------------|
| <b>Demographics</b>                                                  |                                                                                             |                                                                                                                                   |                                                     |
| Age, years                                                           | 46                                                                                          | 62                                                                                                                                | 44                                                  |
| Sex                                                                  | Male                                                                                        | Male                                                                                                                              | Male                                                |
| Ethnicity                                                            | Caucasian                                                                                   | Caucasian                                                                                                                         | Afro-Caribbean                                      |
| <b>Clinical findings</b>                                             |                                                                                             |                                                                                                                                   |                                                     |
| Co-morbidities                                                       | Morbid obesity<br>Alcohol abuse                                                             | Morbid obesity<br>Hypertension                                                                                                    | Morbid obesity<br>Hypothyroidism<br>GORD            |
| Concomitant treatment for COVID-19                                   | IV co-amoxiclav<br>Oral clarithromycin<br>Prophylactic dose enoxaparin                      | IV co-amoxiclav<br>Oral clarithromycin<br>Prophylactic dose tinzaparin, switched to rivaroxaban on diagnosis of pulmonary embolus | IV co-amoxiclav<br>Prophylactic dose tinzaparin     |
| SOFA score on admission                                              | 5                                                                                           | 6                                                                                                                                 | 7                                                   |
| Blood pressure on admission, mmHg                                    | 134/90                                                                                      | 90/67                                                                                                                             | 122/76                                              |
| PaO <sub>2</sub> on admission (room air), kPa                        | 8.11                                                                                        | 8.44                                                                                                                              | 8.23                                                |
| O <sub>2</sub> saturation on admission on arterial gas (room air), % | 92.7                                                                                        | 92.8                                                                                                                              | 92.7                                                |
| FiO <sub>2</sub> required via Venturi mask, %                        | 40                                                                                          | 40                                                                                                                                | 40                                                  |
| CRP on admission, mg/dL (normal range <6)                            | 224                                                                                         | 147                                                                                                                               | 209                                                 |
| Imaging findings on admission                                        | Extensive bilateral nodular densities with superimposing consolidation involving both lungs | Peripheral ground glass opacification throughout both lobes                                                                       | Extensive bilateral peripheral patchy opacification |
| Day of admission on which iloprost infusion was initiated            | 2                                                                                           | 9                                                                                                                                 | 2                                                   |
| PaO <sub>2</sub> /FiO <sub>2</sub> pre-iloprost, mmHg                | 152                                                                                         | 158                                                                                                                               | 154                                                 |
| PaO <sub>2</sub> /FiO <sub>2</sub> 5 days post-iloprost, mmHg        | 344                                                                                         | 312                                                                                                                               | 330                                                 |
| Adverse effects from treatment                                       | None                                                                                        | Diarrhoea                                                                                                                         | None                                                |
| Bleeding complications                                               | None                                                                                        | None                                                                                                                              | None                                                |
| Disease-related complications                                        | None                                                                                        | Pulmonary embolus                                                                                                                 | None                                                |
| Clinical outcome                                                     | Discharged on day 8                                                                         | Discharged on day 22                                                                                                              | Discharged on day 7                                 |

GORD=Gastro-oesophageal reflux disease. SOFA score=sequential organ failure assessment score.

**Supplementary Table: Demographic and clinical characteristics of three patients with COVID-19 treated with 5-day continuous iloprost infusion.**

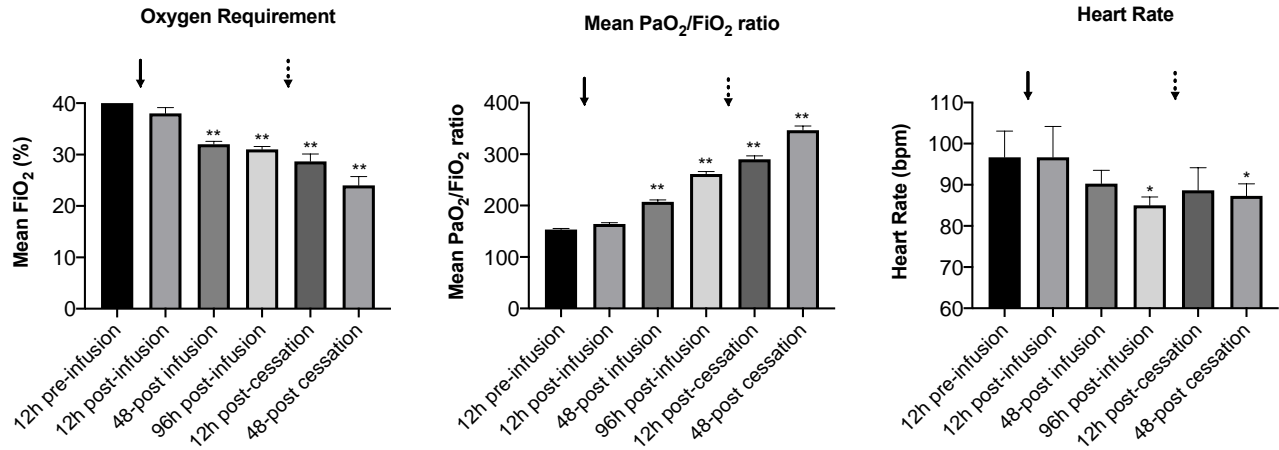

**Supplementary Figure 1: Effects of a continuous 5-day infusion of iloprost therapy given to COVID-19 patients with peripheral ischaemia (n=3).** Data are mean values; errors bars indicate standard error of the mean. First arrow indicates when infusion was initiated. Second arrow indicates when infusion was stopped. \*= $p < 0.05$ , \*\*= $p < 0.01$ , compared to baseline values with a paired t-test. PaO<sub>2</sub>=partial pressure of oxygen in arterial blood. FiO<sub>2</sub>=fractional concentration of oxygen in inspired air. bpm=beats per minute.

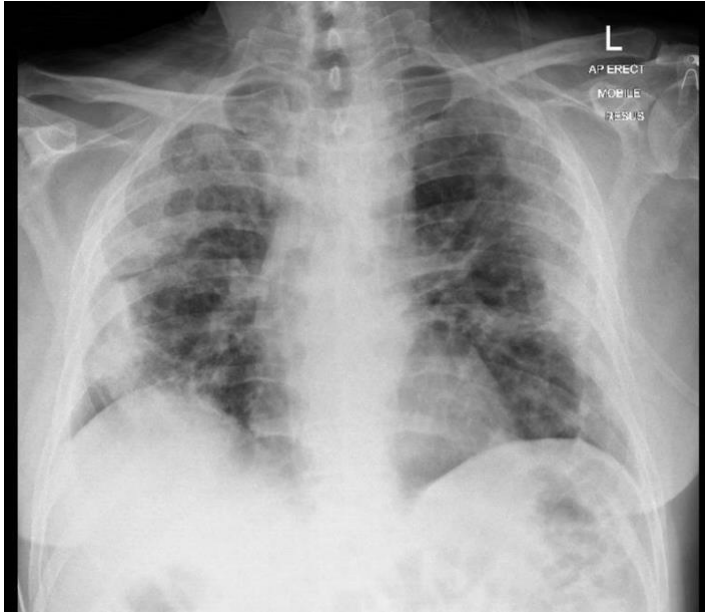

***Supplementary Figure 2:*** Chest radiograph of one patient from the study on admission showing bilateral peripheral patchy opacification consistent with COVID-19.
